# Supplementary material for: Leaf water content contributes to global leaf trait relationships
Source: PubMed Central journal article supplement (PMC9492732; doi:10.1038/s41467-022-32784-1), 2022-09-21
Supplement: 41467_2022_32784_MOESM1_ESM.pdf [file 41467_2022_32784_MOESM1_ESM.pdf]

## **Supplementary Information for**

### **Leaf water content contributes to global leaf trait relationships**

Zhiqiang Wang, Heng Huang\*, Han Wang, Josep Peñuelas, Jordi Sardans, Ülo Niinemets,

Karl J. Niklas, Yan Li, Jiangbo Xie, and Ian J. Wright

\*Corresponding author: Heng Huang, [henghuang@berkeley.edu](mailto:henghuang@berkeley.edu)

**Supplementary Table 1.** Results of bootstrap nonlinear regression analysis by fitting the model to global leaf trait data.

| Parameter                   | Estimate | S.E. | Low 95%CI | High 95%CI |
|-----------------------------|----------|------|-----------|------------|
| Photosynthesis (Equation 2) |          |      |           |            |
| $\ln(g_1)$                  | -2.25    | 5.40 | -13.22    | 8.59       |
| $k_1$                       | 2.35     | 0.55 | 1.54      | 3.59       |
| $K_1$                       | 0.94     | 1.49 | 0.25      | 2.65       |
| $E$                         | -0.13    | 0.14 | -0.40     | 0.15       |
| SLA (Equation 5)            |          |      |           |            |
| $\ln(g_2)$                  | 4.79     | 0.36 | 4.07      | 5.48       |
| $k_1$                       | 2.53     | 0.07 | 2.40      | 2.68       |
| $K_1$                       | 1.52     | 0.16 | 1.23      | 1.86       |
| $E$                         | 0.03     | 0.01 | 0.01      | 0.05       |

Note:  $g_1$  and  $g_2$ , intercepts;  $k_1$ , the maximum increase in  $\ln(P_s)$  and  $\ln(\text{SLA})$  due to changes in leaf water content;  $K_1$ , leaf water content when the mean reaction rate of cellular metabolism reaches one-half of its maximum;  $E$ , activation energy.

**Supplementary Table 2.** Summary of leaf area-mass scaling relationships for the different plant groups.

| Plant group             | <i>n</i> | Temperature & LWC correction | Intercept | Exponent | 95% CI    | <i>r</i> <sup>2</sup> |
|-------------------------|----------|------------------------------|-----------|----------|-----------|-----------------------|
| <i>Growth form</i>      |          |                              |           |          |           |                       |
| Graminoid               | 491      | No                           | 5.36      | 1.07     | 1.04-1.10 | 0.92                  |
|                         | 491      | Yes                          | 5.04      | 1.05     | 1.03-1.07 | 0.93                  |
| Forb                    | 1688     | No                           | 5.33      | 1.02     | 1.00-1.03 | 0.93                  |
|                         | 1688     | Yes                          | 4.80      | 1.01     | 0.99-1.02 | 0.94                  |
| Shrub                   | 1097     | No                           | 5.24      | 1.10     | 1.08-1.11 | 0.95                  |
|                         | 1097     | Yes                          | 4.95      | 1.05     | 1.04-1.06 | 0.96                  |
| Tree                    | 832      | No                           | 4.73      | 0.95     | 0.93-0.98 | 0.86                  |
|                         | 832      | Yes                          | 4.54      | 0.94     | 0.92-0.96 | 0.91                  |
| <i>Ecosystem</i>        |          |                              |           |          |           |                       |
| Desert                  | 97       | No                           | 5.07      | 1.04     | 1.00-1.08 | 0.97                  |
|                         | 97       | Yes                          | 4.88      | 1.02     | 0.99-1.06 | 0.97                  |
| Grassland               | 1285     | No                           | 5.16      | 0.99     | 0.98-1.01 | 0.93                  |
|                         | 1285     | Yes                          | 4.74      | 0.99     | 0.98-1.00 | 0.95                  |
| Forest                  | 1367     | No                           | 4.91      | 0.91     | 0.90-0.93 | 0.87                  |
|                         | 1367     | Yes                          | 4.68      | 0.93     | 0.92-0.95 | 0.92                  |
| Tundra                  | 1271     | No                           | 5.29      | 1.09     | 1.07-1.11 | 0.89                  |
|                         | 1271     | Yes                          | 4.68      | 1.01     | 0.99-1.02 | 0.92                  |
| Wetland                 | 114      | No                           | 4.60      | 1.03     | 0.98-1.09 | 0.92                  |
|                         | 114      | Yes                          | 4.49      | 1.02     | 0.98-1.07 | 0.95                  |
| <i>Latitudinal zone</i> |          |                              |           |          |           |                       |
| Tropical                | 1111     | No                           | 4.99      | 0.94     | 0.92-0.95 | 0.91                  |
|                         | 1111     | Yes                          | 4.65      | 0.98     | 0.96-0.99 | 0.94                  |
| Temperate               | 2113     | No                           | 5.05      | 1.00     | 0.99-1.01 | 0.91                  |
|                         | 2113     | Yes                          | 4.81      | 1.01     | 1.00-1.02 | 0.94                  |
| Boreal                  | 910      | No                           | 5.35      | 1.10     | 1.08-1.12 | 0.91                  |
|                         | 910      | Yes                          | 4.91      | 1.04     | 1.02-1.05 | 0.95                  |
| All                     | 4134     | No                           | 5.12      | 1.02     | 1.02-1.03 | 0.92                  |
|                         | 4134     | Yes                          | 4.77      | 1.01     | 1.00-1.01 | 0.95                  |

**Supplementary Fig. 1.** The scaling of temperature-corrected whole-leaf photosynthesis ( $P_L$ ,  $\text{nmol s}^{-1}$ ) with leaf area ( $A_L$ ,  $\text{cm}^2$ ).

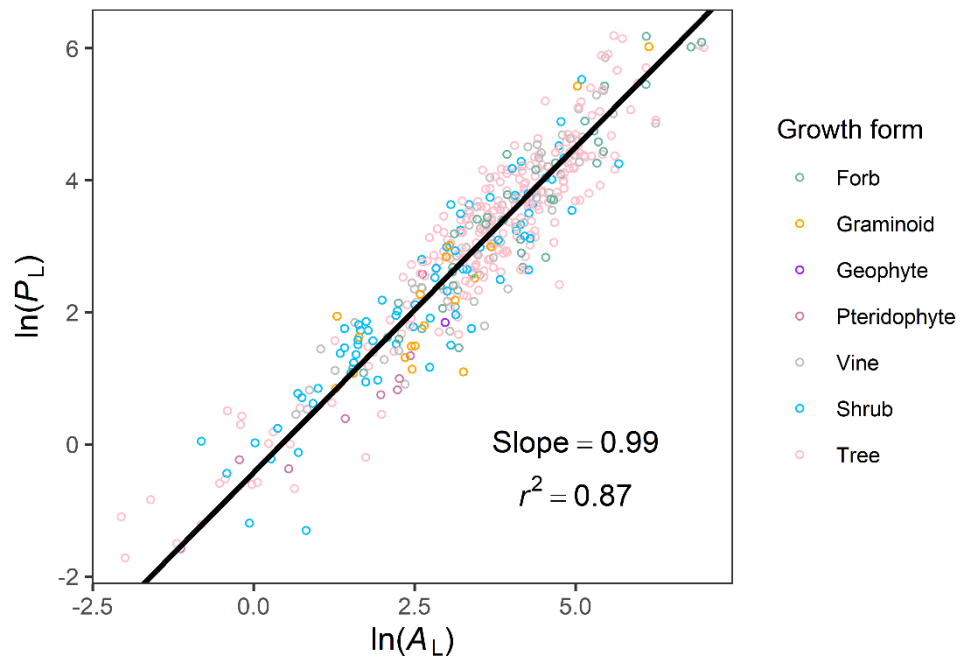

**Supplementary Fig. 2.** The scaling of leaf water content with leaf mass ( $M_L$ , g) across the pooled data.

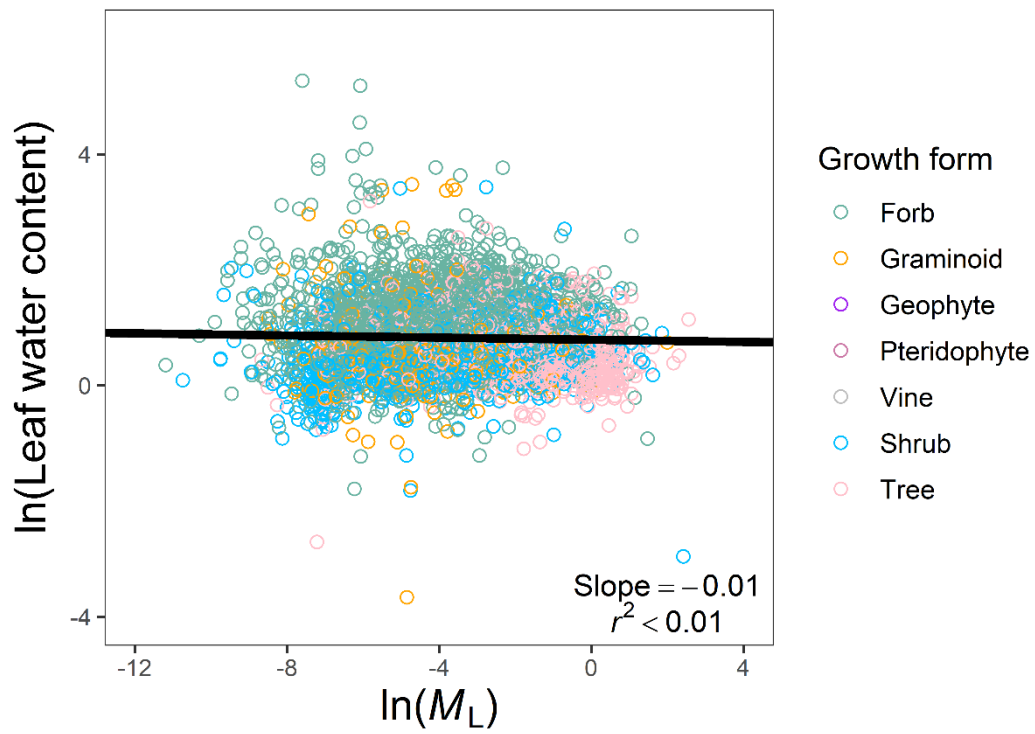

**Supplementary Fig. 3.** The effect of leaf water content on the rate of change in temperature-corrected leaf photosynthetic rate  $P_L e^{E/kT}$  (a) and leaf area  $A_L e^{E/kT}$  (b) with respect to differences in  $M_L$ . The numerical values of parameters  $k_1$  and  $K_1$  used to quantify the dynamics of  $P_L e^{E/kT}$  and  $A_L e^{E/kT}$  were obtained from the non-linear fitting results of Eqs. 2 and 5, respectively.

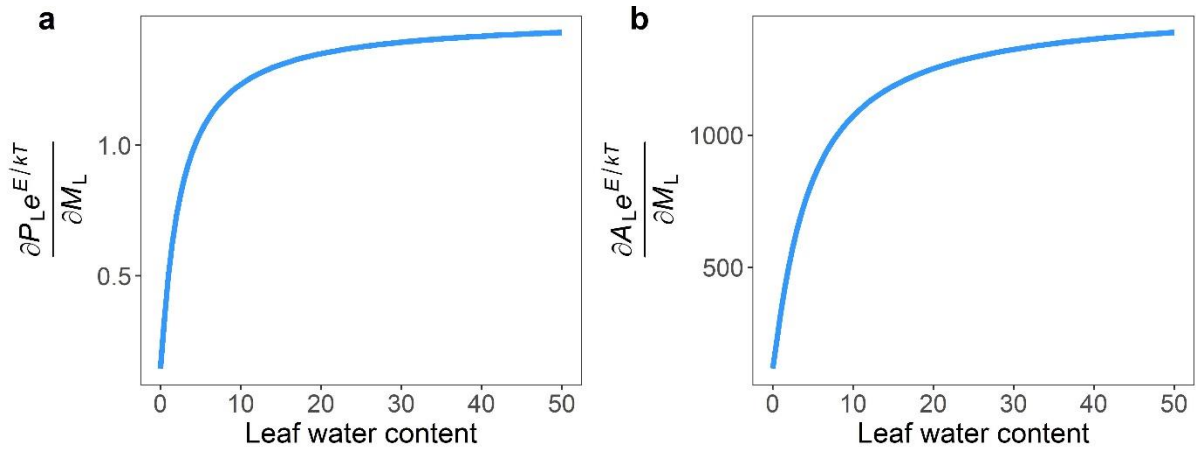

**Supplementary Fig. 4.** The scaling of LWC (**a**) and temperature-corrected SLA (**b**) with mean annual precipitation (MAP, mm) across the pooled data. LOWESS curves (blue lines) and 95% confidence intervals are shown.

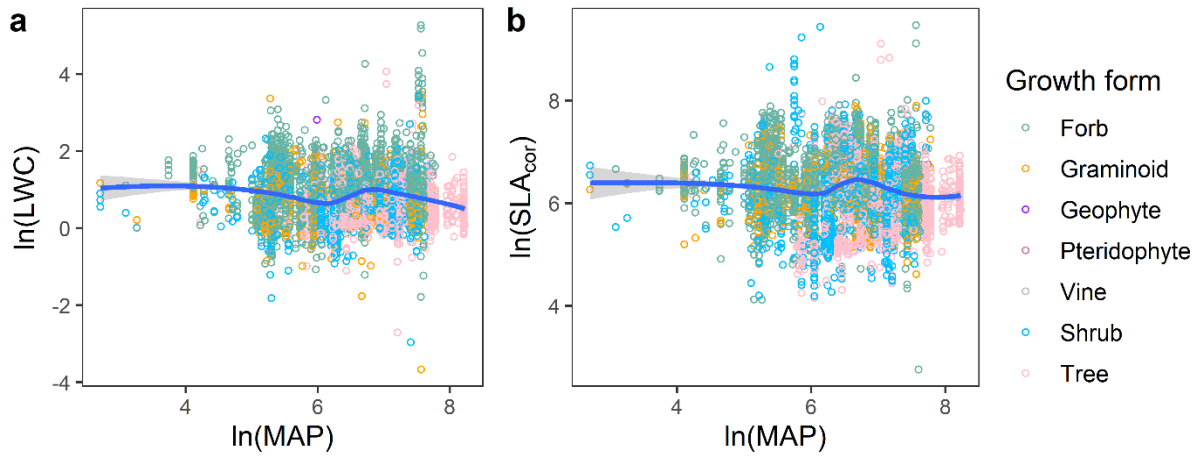

## Data Sources

1. Anderegg, L. D. *et al.* Aridity drives coordinated trait shifts but not decreased trait variance across the geographic range of eight Australian trees. *New Phytol.* **229**, 1375-1387 (2020).
2. Bachmann, D., Roscher C. & Buchmann, N. How do leaf trait values change spatially and temporally with light availability in a grassland diversity experiment? *Oikos* **127**, 935-948 (2017).
3. Burton, J. I., Perakis, S. S., McKenzie, S. C., Lawrence, C. E. & Puettmann, K. J. Intraspecific variability and reaction norms of forest understory plant species traits. *Funct. Ecol.* **31**, 1881-1893 (2017).
4. Cerabolini, E. L. *et al.* Can CSR classification be generally applied outside Britain? *Plant Ecology* **210**, 253-261 (2010).
5. De Long, J. R. *et al.* Relationships between plant traits, soil properties and carbon fluxes differ between monocultures and mixed communities in temperate grassland. *J. Ecol.* **107**, 1704-1719 (2019).
6. Hu, Y. K. *et al.* Is there coordination of leaf and fine root traits at local scales? A test in temperate forest swamps. *Ecol. Evol.* **9**, 8714-8723 (2019).
7. Miatto, R. C., Wright, I. J. & Batalha, M. A. Relationships between soil nutrient status and nutrient-related leaf traits in Brazilian cerrado and seasonal forest communities. *Plant Soil* **404**, 13-33 (2016).
8. Nunes, M. H., Davey, M. P. & Combes, D. A. Leaf trait variation and field spectroscopy of generalist tree species on contrasting soil types. *Biogeosciences* **14**, 3371-3385 (2016).
9. Soudzilovskaia, N. A. *et al.* Functional traits predict relationship between plant abundance dynamic and long-term climate warming. *Proc. Natl Acad. Sci. USA* **110**, 18180-18184 (2013).
10. Vandvik, V. *et al.* Plant traits and vegetation data from climate warming experiments along and 1100m elevation gradient in Gongga Mountains, China. *Sci. Data* **7**, 189 (2020).
11. Wigley, B. J. *et al.* Leaf traits of African woody savanna species across climate and soil fertility gradients: evidence for conservative versus acquisitive resource-use strategies. *J. Ecol.* **104**, 1357-1369 (2016).
12. Zhang, H. *et al.* Using functional trait diversity patterns to disentangle the



scale-dependent ecological processes in a subtropical forest. *Funct. Ecol.* **32**, 1379-1389 (2018).
